# Supplementary material
Source: Springer Nature journal article supplement (https://www.springermedizin.de/resource/supplementary/12879_2011_1746_MOESM5_ESM.pdf/9443326)

**A**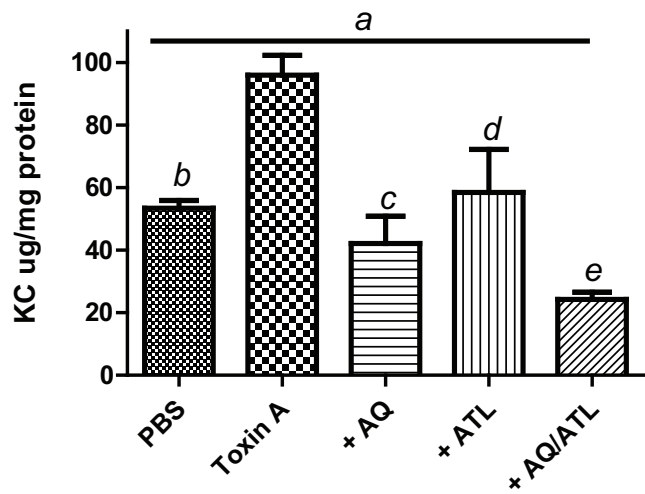**B**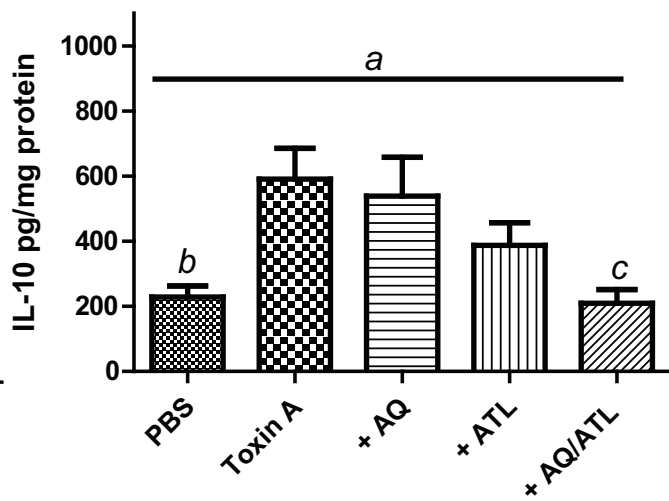**C**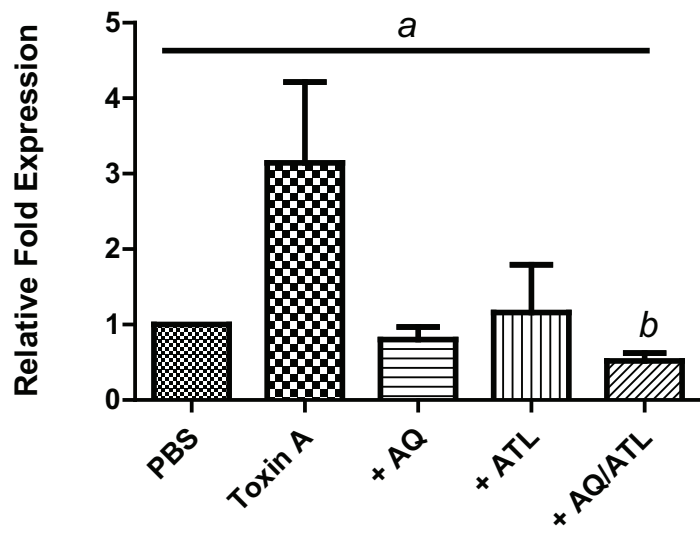**D**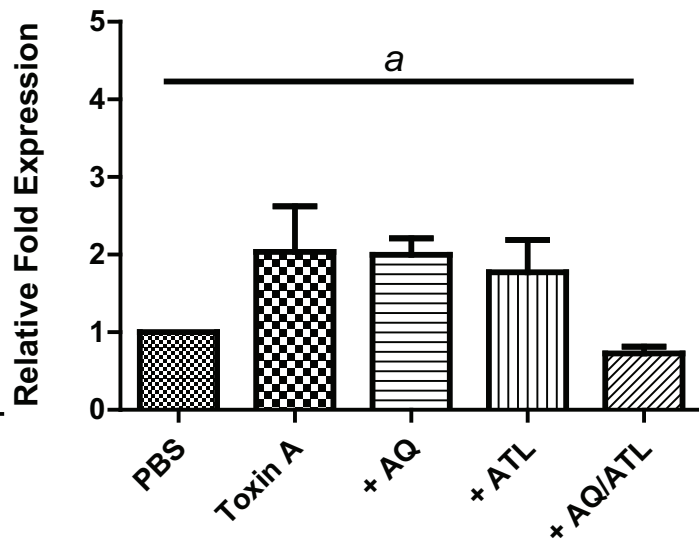

Supplement: MOESM5 [file 9443326]
